# Supplementary material for: Bone-targeting exosome nanoparticles activate Keap1 / Nrf2 / GPX4 signaling pathway to induce ferroptosis in osteosarcoma cells
Source: PubMed Central journal article supplement (PMC10541697; doi:10.1186/s12951-023-02129-1), 2023-09-30
Supplement: 12951_2023_2129_MOESM1_ESM.pdf [file 12951_2023_2129_MOESM1_ESM.pdf]

## Supplementary figures and figure legends

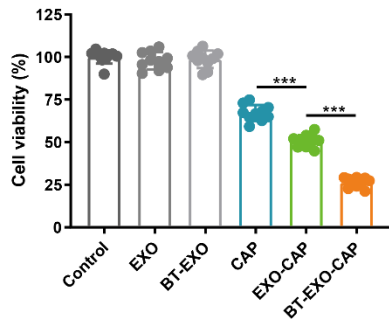

Figure S1. The effect of Exosomes, Bone targeting exosomes and Capreomycin on the activity of OS cells. \*\*\*  $P < 0.001$ .

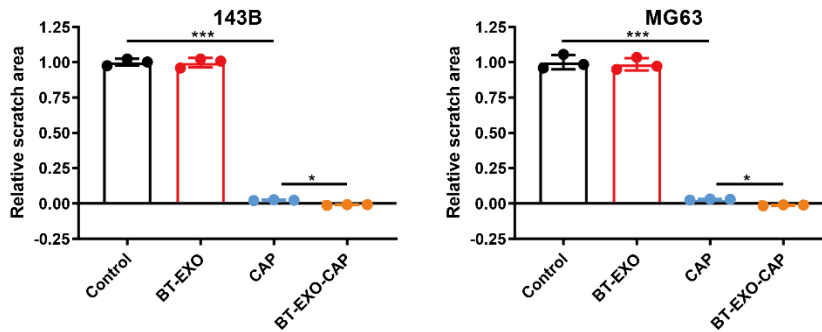

Figure S2. Statistics of cell scratch experiments. \*  $P < 0.05$ , \*\*\*  $P < 0.001$ .

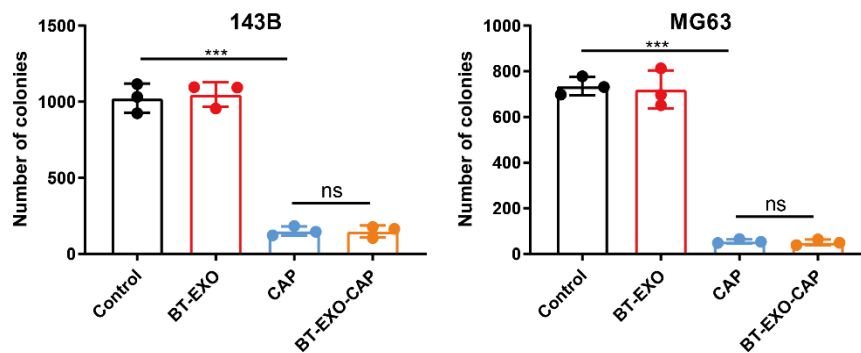

Figure S3. Statistics of cell cloning experiments. \*\*\*  $P < 0.001$ .

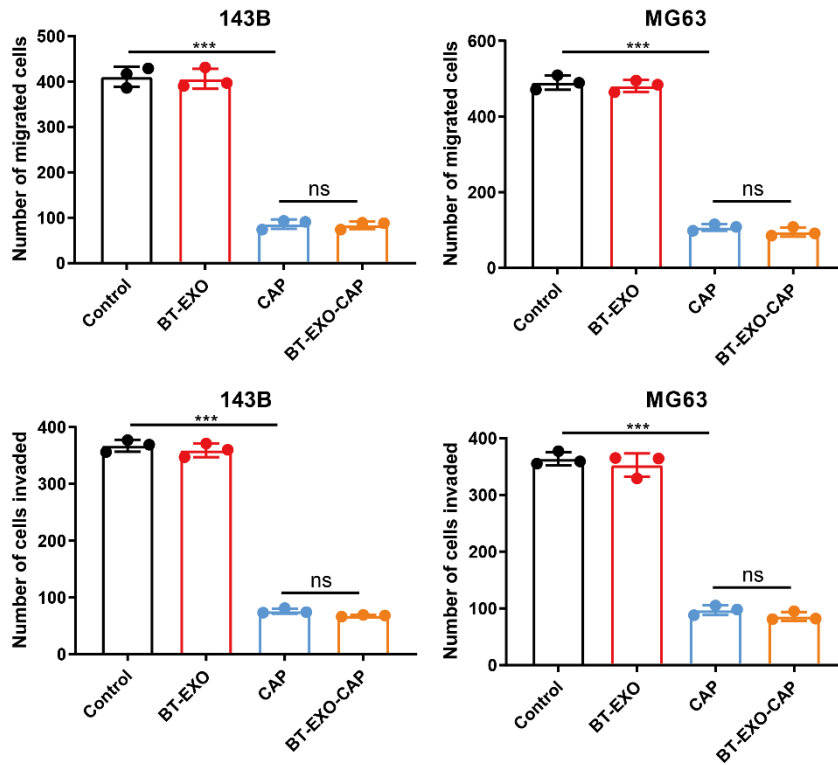

Figure S4. Statistics of cell migration and invasion experiments. \*\*\*  $P < 0.001$ .

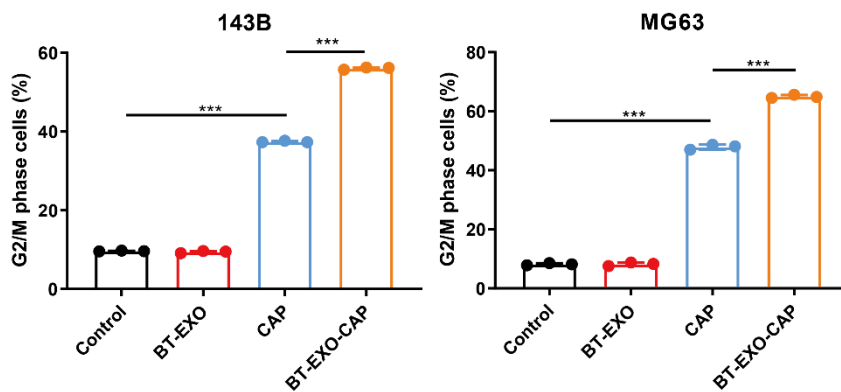

Figure S5. Statistics of the cell cycle at G2/M phase. \*\*\*  $P < 0.001$ .

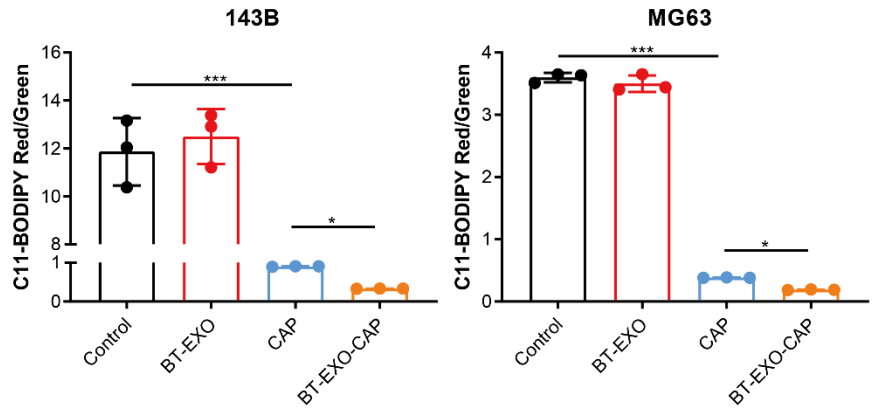

**Figure S6.** The proportion of C11-BODIPY red cells to green cells. \*  $P < 0.05$ , \*\*\*  $P < 0.001$ .

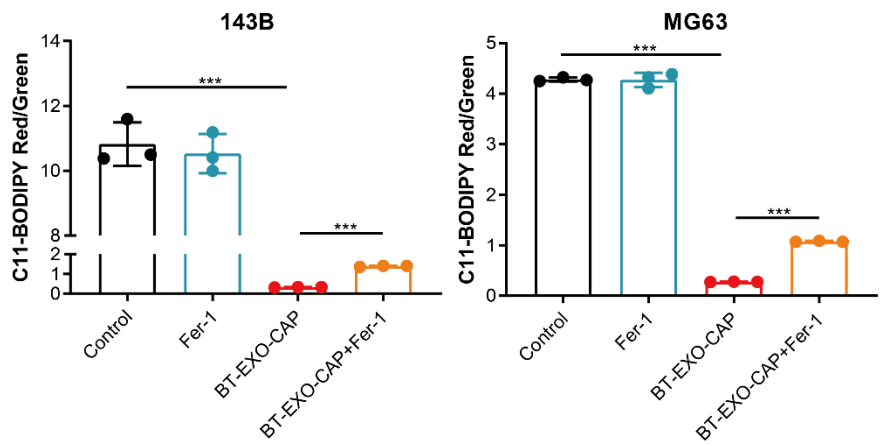

**Figure S7.** The proportion of C11-BODIPY red cells to green cells. \*\*\*  $P < 0.001$ .

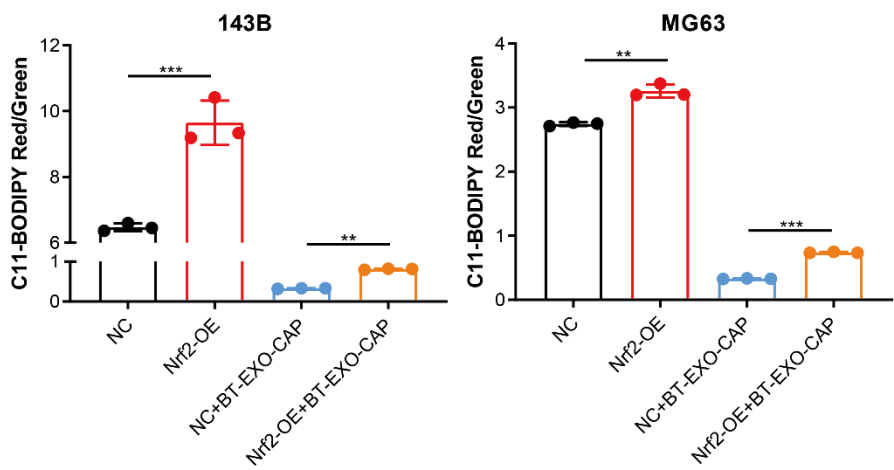

**Figure S8.** The proportion of C11-BODIPY red cells to green cells. \*\*  $P < 0.01$ , \*\*\*  $P < 0.001$ .
